# Supplementary material for: Species-Level Resolution of Female Bladder Microbiota from 16S rRNA Amplicon Sequencing
Source: PubMed Central journal article supplement (PMC8547459; doi:10.1128/msystems.00518-21), 2021-09-14
Supplement: msystems.00518-21-sf001.pdf [file msystems.00518-21-sf001.pdf]

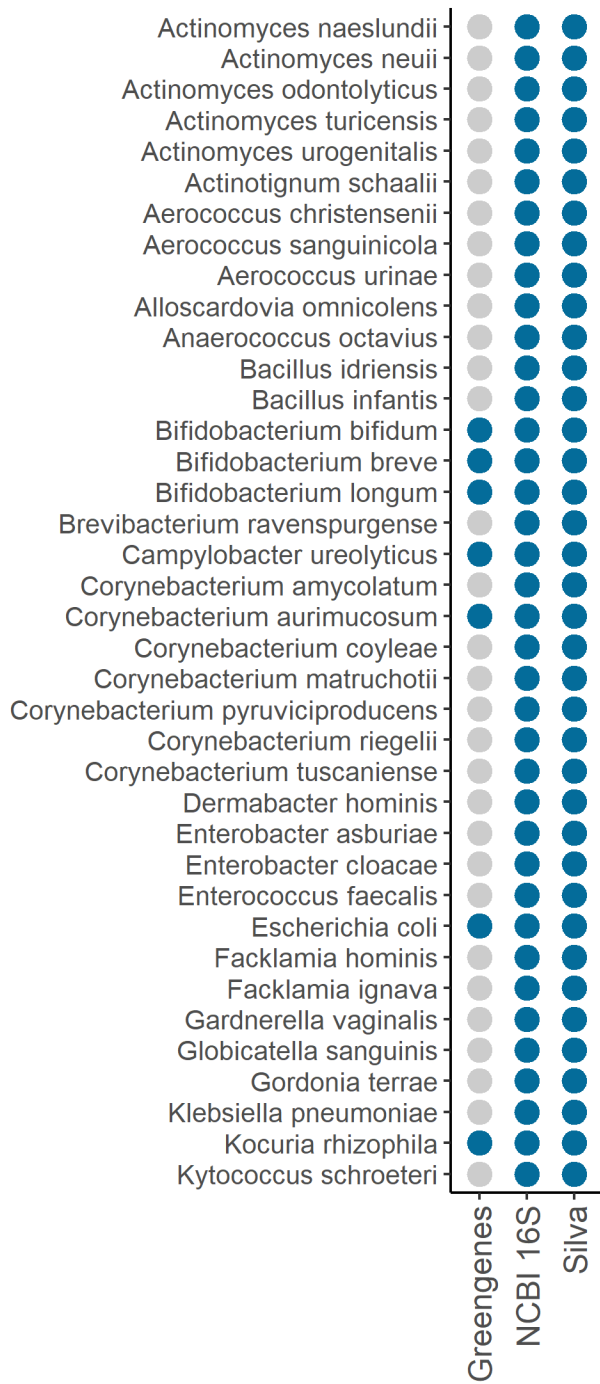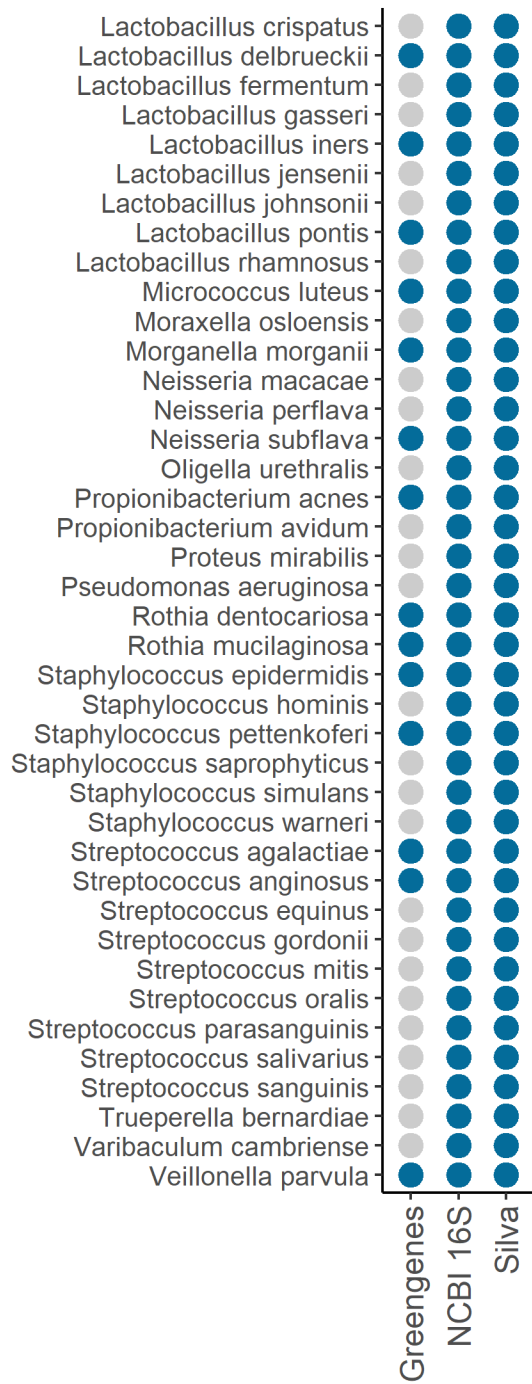

Species

- present
- absent
