# Supplementary material for: Species-Level Resolution of Female Bladder Microbiota from 16S rRNA Amplicon Sequencing
Source: PubMed Central journal article supplement (PMC8547459; doi:10.1128/msystems.00518-21), 2021-09-14

region  
 V1-V3 (blue)  
 V2-V3 (light blue)  
 V3 (green)  
 V3-V4 (light green)  
 V4 (red)  
 V4-V6 (pink)  
 V6 (orange)

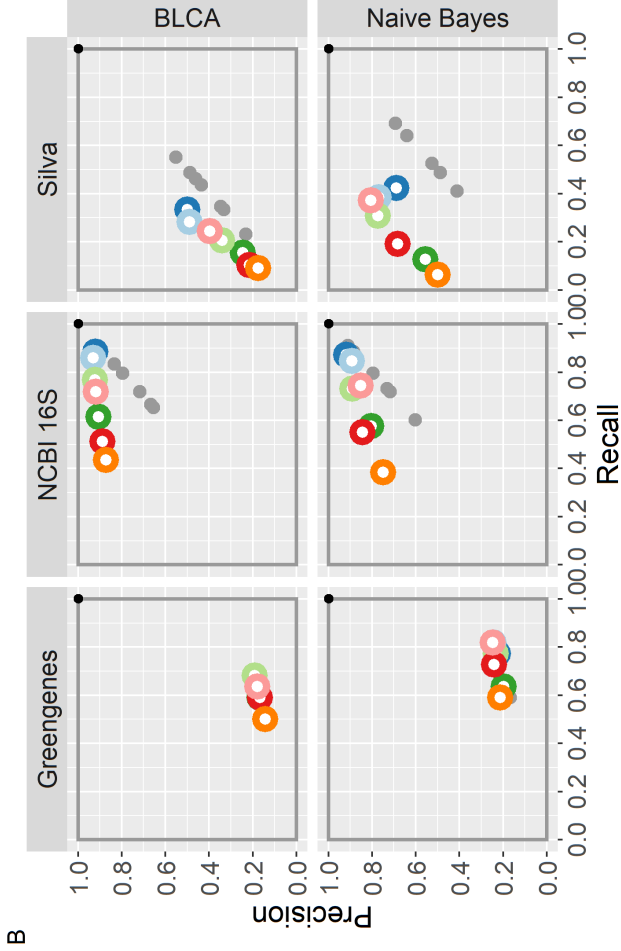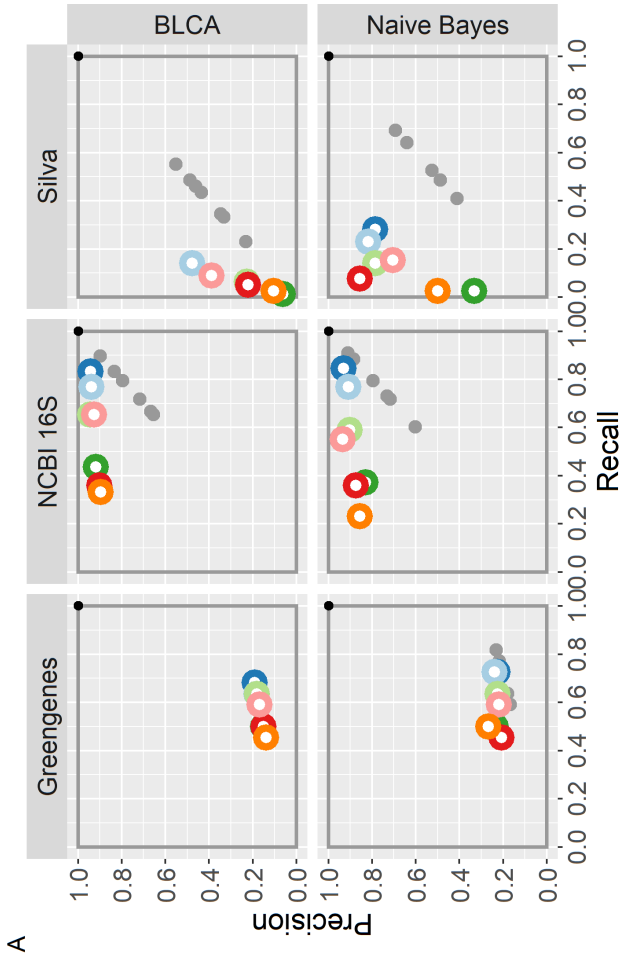

Supplement: msystems.00518-21-sf002.pdf [file msystems.00518-21-sf002.pdf]
